# Supplementary material for: Distribution of nephrologists and regional variation in the clinical severity of IgA nephropathy at biopsy diagnosis in Japan: a cross-sectional study
Source: PubMed Central journal article supplement — BMJ Open. 2018 Oct 31;8(10):e024317. doi: 10.1136/bmjopen-2018-024317 (PMC6224759; doi:10.1136/bmjopen-2018-024317), 2018-10-31
Supplement: bmjopen-2018-024317supp001.pdf [file bmjopen-2018-024317supp001.pdf]

**Supplementary table 1. Regional populations and the number of nephrologists in Japan.**

| Regions    | Populations<br>(×1,000) | Number of<br>nephrologists |
|------------|-------------------------|----------------------------|
| Hokkaido   | 5460                    | 86                         |
| Tohoku     | 9155                    | 250                        |
| Kanto      | 42631                   | 1719                       |
| Koshinetsu | 5331                    | 174                        |
| Hokuriku   | 3044                    | 129                        |
| Tokai      | 15063                   | 432                        |
| Kinki      | 20845                   | 721                        |
| Chugoku    | 7504                    | 230                        |
| Shikoku    | 3932                    | 120                        |
| Kyushu     | 13144                   | 421                        |
| Total      | 126109                  | 4282                       |
