# Supplementary material for: Distribution of nephrologists and regional variation in the clinical severity of IgA nephropathy at biopsy diagnosis in Japan: a cross-sectional study
Source: PubMed Central journal article supplement — BMJ Open. 2018 Oct 31;8(10):e024317. doi: 10.1136/bmjopen-2018-024317 (PMC6224759; doi:10.1136/bmjopen-2018-024317), 2018-10-31

## Supplementary Figure 1

(A) IgAN with a very-high-risk renal prognosis

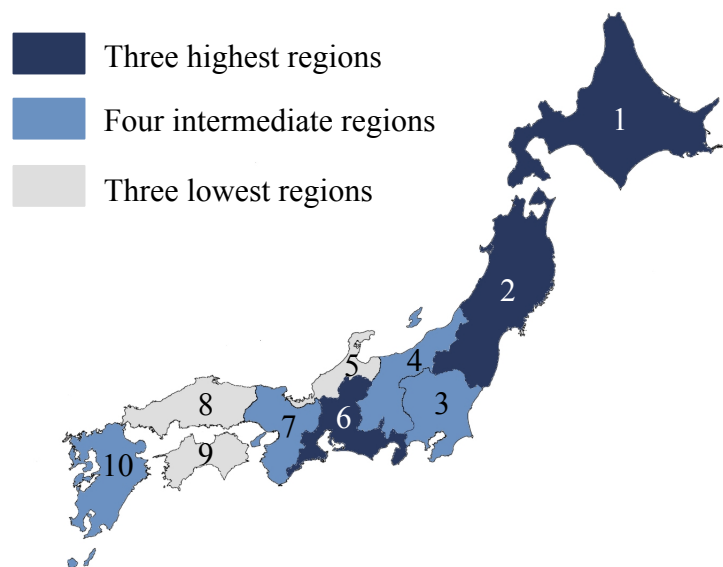

(B) Health checkup participants

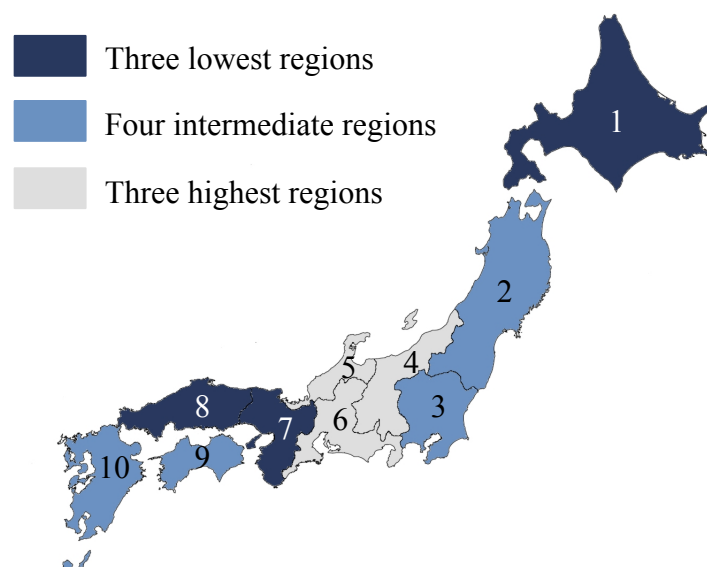

(C) Elderly population

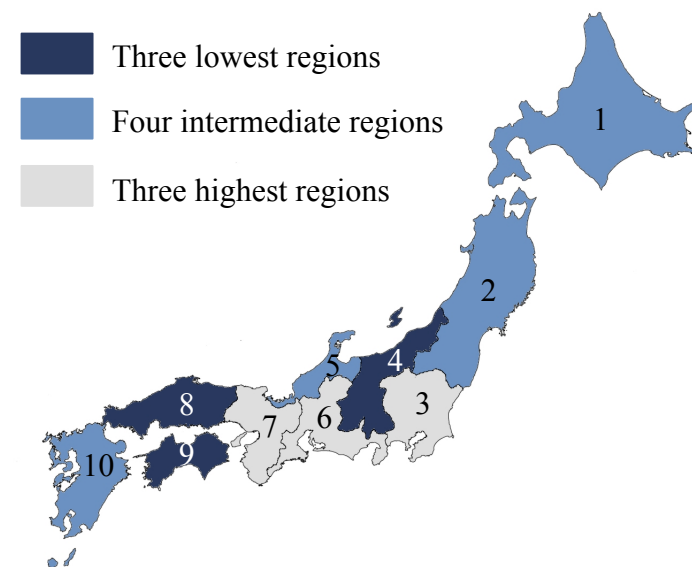

Supplement: bmjopen-2018-024317supp002.pdf [file bmjopen-2018-024317supp002.pdf]
